# Supplementary material
Source: publisher site journal article supplement (https://www.dovepress.com/article/318651)
Supplement: Supplementary file 1 [file get_supplementary_file.php]

**Supplementary 1: Search strategy**

| **PubMed (MEDLINE)** |
| --- |
| (((((((psychosis[MeSH Terms]) OR psychosis[Title/Abstract]) OR psycho*[Title/Abstract]) OR madness[Title/Abstract]) OR psychiatric[Title/Abstract]) AND ( "1980/01/01"[PDat] : "2019/12/31"[PDat] ) AND English[lang])) AND ((((((hypothyroidism[MeSH Terms]) OR hypothyroid*[Title/Abstract]) OR myxedema[MeSH Terms]) OR myxedema*[Title/Abstract]) OR myxoedema*[Title/Abstract]) AND ( "1980/01/01"[PDat] : "2019/12/31"[PDat] ) AND English[lang]). |
| **EMBASE** |
| ('hypothyroidism'/exp OR 'myxedema'/exp OR 'myxoedema*':ti,ab OR 'myxedema*':ab,ti OR 'hypothyroid*':ab,ti) AND ('psychosis'/exp OR 'psychiatric':ab,ti OR 'psychosis':ab,ti OR 'psychotic':ab,ti OR 'madness':ab,ti) AND [english]/lim AND ([embase]/lim OR [medline]/lim OR [pubmed-not-medline]/lim) AND [1980-2019]/py |

**Supplementary 2:** Table summarizing the quality of included case studies

| **Case study** | **Do the patients represent the whole experiences of the center or is the selection method unclear (other patient with similar presentation may not have been reported)?** | **Was the exposure adequately ascertained?** | **Was the outcome adequately ascertained?** | **Were other causes that may explain the observation ruled out?** | **Was there a challenge/rechallenge phenomenon?** | **Was there a dose-response effect?** | **Was follow-up long enough for outcome to occur?** | **Are the cases described with sufficient details to allow other investigators to replicate the research or to allow practitioners make inferences related to their own practice?** | **Overall score** | **Qualitative assessment** |
| --- | --- | --- | --- | --- | --- | --- | --- | --- | --- | --- |
| Reddy 2019 1 | 1 | 1 | 1 | 1 | 0 | 0 | 0 | 0 | 4 | Fair |
| Mohamed 2019 2 | 1 | 1 | 1 | 1 | 0 | 0 | 1 | 1 | 6 | Good |
| Singh 2019 3 | 1 | 1 | 1 | 0 | 0 | 0 | 0 | 0 | 3 | Poor |
| Fernandes 2019 4 | 1 | 1 | 1 | 1 | 0 | 0 | 1 | 1 | 6 | Good |
| Todorov 2019 5 | 1 | 1 | 1 | 1 | 0 | 0 | 1 | 1 | 6 | Good |
| Natarajan 2019 6 | 1 | 1 | 1 | 1 | 0 | 0 | 0 | 1 | 5 | Fair |
| Mavroson 2017 7 | 1 | 1 | 1 | 1 | 0 | 0 | 0 | 1 | 5 | Fair |
| Philip 2017 8 | 1 | 1 | 1 | 0 | 0 | 0 | 0 | 0 | 3 | Poor |
| Gupta 2017 9 | 1 | 1 | 1 | 1 | 0 | 0 | 0 | 1 | 5 | Fair |
| Rizvi 2017 10 | 1 | 1 | 1 | 1 | 0 | 0 | 1 | 1 | 6 | Good |
| Zorkin 2017 11 | 1 | 1 | 1 | 1 | 0 | 0 | 0 | 1 | 5 | Fair |
| Das 2017 12 | 1 | 1 | 1 | 1 | 0 | 0 | 1 | 1 | 6 | Good |
| O'Hanlon 2017 13 | 1 | 1 | 1 | 0 | 0 | 0 | 0 | 0 | 3 | Poor |
| Shlykov 2016 14 | 1 | 1 | 1 | 1 | 0 | 0 | 1 | 1 | 6 | Good |
| Er 2016 15 | 1 | 1 | 1 | 1 | 0 | 0 | 1 | 1 | 6 | Good |
| Nazou 2016 16 | 1 | 1 | 1 | 1 | 0 | 0 | 1 | 1 | 6 | Good |
| Agachanli 2016 17 | 1 | 1 | 1 | 1 | 0 | 0 | 1 | 1 | 6 | Good |
| Morgado 2016 18 | 1 | 1 | 1 | 1 | 0 | 0 | 1 | 1 | 6 | Good |
| Mehta 2016 19 | 1 | 1 | 1 | 1 | 0 | 0 | 0 | 1 | 5 | Fair |
| Larouche 2015 20 | 1 | 1 | 1 | 1 | 0 | 0 | 1 | 1 | 6 | Good |
| Ueno 2015 21 | 1 | 1 | 1 | 1 | 0 | 0 | 0 | 1 | 5 | Fair |
| Hines 2015 22 | 1 | 1 | 1 | 1 | 0 | 0 | 0 | 1 | 5 | Fair |
| Bel Feki 2015 23 | 1 | 1 | 1 | 0 | 0 | 0 | 0 | 0 | 3 | Poor |
| Amdouni 2015 24 | 1 | 1 | 1 | 0 | 0 | 0 | 0 | 0 | 3 | Poor |
| Berkowitz 2015 25 | 1 | 1 | 1 | 0 | 0 | 0 | 1 | 0 | 4 | Fair |
| Hynicka 2015 26 | 1 | 1 | 1 | 0 | 0 | 0 | 0 | 0 | 3 | Poor |
| MorosÃ¡n 2014 27 | 1 | 1 | 1 | 1 | 0 | 0 | 1 | 1 | 6 | Good |
| Baziki 2014 28 | 1 | 1 | 1 | 0 | 0 | 0 | 0 | 0 | 3 | Poor |
| Juneja 2014 29 | 1 | 1 | 1 | 1 | 0 | 0 | 0 | 0 | 4 | Poor |
| Parikh 2014 30 | 1 | 1 | 1 | 1 | 0 | 0 | 0 | 1 | 5 | Fair |
| Islam 2013 31 | 1 | 1 | 1 | 1 | 0 | 0 | 1 | 1 | 6 | Fair |
| Tuman 2013 32 | 1 | 1 | 1 | 0 | 0 | 0 | 0 | 0 | 3 | Poor |
| Lazaro 2013 33 | 1 | 1 | 1 | 1 | 0 | 0 | 1 | 1 | 6 | Good |
| Lin CL 2013 34 | 1 | 1 | 1 | 1 | 0 | 0 | 1 | 1 | 6 | Good |
| Dastjerdi 2013 35 | 1 | 1 | 1 | 0 | 0 | 0 | 1 | 0 | 4 | Poor |
| Hyams 2013 36 | 1 | 1 | 1 | 1 | 0 | 0 | 1 | 1 | 6 | Good |
| Atilan 2013 37 | 1 | 1 | 1 | 0 | 0 | 0 | 0 | 0 | 3 | Poor |
| Weston 2013 38 | 1 | 1 | 1 | 1 | 0 | 0 | 1 | 1 | 6 | Good |
| Sharma 2013 39 | 1 | 1 | 1 | 0 | 0 | 0 | 0 | 0 | 3 | Poor |
| Neal 2012 40 | 1 | 1 | 1 | 0 | 0 | 0 | 0 | 0 | 3 | Poor |
| Martell 2012 41 | 1 | 1 | 1 | 1 | 0 | 0 | 1 | 1 | 6 | Good |
| Leung 2011 42 | 1 | 1 | 1 | 1 | 0 | 0 | 0 | 0 | 4 | Fair |
| Kumar 2011 43 | 1 | 1 | 1 | 1 | 0 | 0 | 0 | 0 | 4 | Fair |
| Manea 2011 44 | 1 | 1 | 1 | 0 | 0 | 0 | 1 | 0 | 4 | Fair |
| Khemka 2011 45 | 1 | 1 | 1 | 1 | 0 | 0 | 0 | 1 | 5 | Fair |
| Khemka 2011 45 | 1 | 1 | 1 | 1 | 0 | 0 | 0 | 1 | 5 | Fair |
| Azzopardi 2010 46 | 1 | 1 | 1 | 1 | 0 | 0 | 0 | 1 | 5 | Fair |
| Nielsen 2010 47 | 1 | 1 | 1 | 1 | 0 | 0 | 0 | 1 | 5 | Fair |
| Kandukuri 2010 48 | 1 | 1 | 1 | 1 | 0 | 0 | 1 | 0 | 5 | Fair |
| Greene 2009 49 | 1 | 1 | 1 | 0 | 0 | 0 | 0 | 1 | 4 | Fair |
| Sathya 2009 50 | 1 | 1 | 1 | 1 | 0 | 0 | 0 | 1 | 5 | Fair |
| Moeller 2009 51 | 1 | 1 | 1 | 1 | 0 | 0 | 0 | 1 | 5 | Fair |
| Selvaraj 2008 52 | 1 | 1 | 1 | 1 | 0 | 0 | 0 | 1 | 5 | Fair |
| Tor 2007 53 | 1 | 1 | 1 | 1 | 0 | 0 | 1 | 1 | 6 | Good |
| Khaldi 2006 54 | 1 | 1 | 1 | 1 | 0 | 0 | 0 | 1 | 5 | Fair |
| Stowell 2005 55 | 1 | 1 | 1 | 1 | 0 | 0 | 0 | 1 | 5 | Fair |
| Heinrich 2003 56 | 1 | 1 | 1 | 1 | 0 | 0 | 0 | 1 | 5 | Fair |
| Benvenga 2003 57 | 1 | 1 | 1 | 1 | 0 | 0 | 1 | 1 | 6 | Good |
| Chari 2002 58 | 1 | 1 | 1 | 1 | 0 | 0 | 1 | 1 | 6 | Good |
| Nathan 1997 59 | 1 | 1 | 1 | 1 | 0 | 0 | 1 | 1 | 6 | Good |
| Westphal 1997 60 | 1 | 1 | 1 | 1 | 0 | 0 | 1 | 1 | 6 | Good |
| Westphal 1997 60 | 1 | 1 | 1 | 1 | 0 | 0 | 1 | 1 | 6 | Good |
| Ward 1994 61 | 1 | 1 | 1 | 0 | 0 | 0 | 1 | 0 | 4 | Fair |
| Pearce 1991 62 | 1 | 1 | 1 | 1 | 0 | 0 | 0 | 0 | 4 | Fair |
| Rao 1990 63 | 1 | 1 | 1 | 1 | 0 | 0 | 0 | 0 | 4 | Fair |
| Darko 1989 64 | 1 | 1 | 1 | 1 | 0 | 0 | 1 | 1 | 6 | Good |
| Davis 1989 65 | 1 | 1 | 1 | 1 | 0 | 0 | 1 | 1 | 6 | Good |
| Santiago 1987 66 | 1 | 1 | 1 | 0 | 0 | 0 | 1 | 0 | 4 | Fair |
| Cook 1986 67 | 1 | 1 | 1 | 0 | 0 | 0 | 0 | 0 | 3 | Poor |
| Cook 1986 67 | 1 | 1 | 1 | 0 | 0 | 0 | 0 | 0 | 3 | Poor |
| Shaw 1985 68 | 1 | 1 | 1 | 1 | 0 | 0 | 1 | 0 | 5 | Fair |
| Samuel 1984 69 | 1 | 1 | 1 | 1 | 0 | 0 | 0 | 1 | 5 | Fair |
| Hall 1982 70 | 1 | 1 | 1 | 1 | 0 | 0 | 1 | 0 | 5 | Fair |
| Hall 1982 70 | 1 | 1 | 1 | 1 | 0 | 0 | 1 | 0 | 5 | Fair |
| Madakasira 198171 | 1 | 1 | 1 | 0 | 0 | 0 | 0 | 0 | 3 | Poor |

**Supplementary 3:** Baseline characteristics of myxedema psychosis patients with abnormalities on EEG, brain imaging or cerebrospinal fluid analysis.

| **Case study** | **Gender** | **Symptom duration [days]** | **TPO Ab positivity** | **Brain imaging description** |  | **EEG** | **CSF analysis** | **Steroids** | **outcome** |
| --- | --- | --- | --- | --- | --- | --- | --- | --- | --- |
| Mohamed 2019 2 | Male, 44 | 14 | No | Normal MRI brain |  | Normal | Mild protein rise | Yes (two days) | Complete recovery |
| Todorov 20195 | Female, 43 | 7 | Yes | MRI showed nonspecific white matter hyperintensities |  | Normal | Normal | No | Complete recovery |
| Ueno 201521 | Male, 90 | 2 | No | MRI showed crescent-shaped foci of T2 hyperintensity visualized as slight effusion below the dura mater. |  | Generalized diffuse slowing and decrease in Alpha wave activity. | Mild protein rise. | No | Partial recovery |
| Azzopardi 2010 46 | Male, 59 | NS | Yes | MRI showed frontal and cerebellar atrophy |  | NS | NS | NS | Partial recovery |
| Kandukuri 2010 48 | Male, 23 | NS | NS | MRI showed enlarged pituitary unchanged from the last image (has MEN syndrome) but no acute insult. |  | NS | NS | No | Recovery with other cognitive deficits |
| Selvaraj 2008 52 | Male, 65 | 21 | NS | CT scan showed chronic microvascular ischemic gliosis. |  | NS | NS | No | Complete recovery |
| Hall 1982 70 | Female, 35 | NS | Yes | Normal CT scan |  | NS | NS | No | Complete recovery |
| Hall 1982 70 | Female, 34 | NS | Yes | NS |  | Generalized slowing with no focal findings | NS | No | Complete recovery |

*NS; not specified, Partial recovery means improvement of psychosis symptoms with no complete resolution, CSF; Cerebrospinal fluid, EEG; Electroencephalogram, MRI; Magnetic resonance imaging, CT scan; Compute tomography, TPO Ab;* thyroid peroxidase antibody, MEN; Multiple endocrine neoplasias.

**References**

1. Reddy KS, Rao GP. Hypothyroidism presenting as acute mania-rare case report. Indian J Psychiatry. 2019;61(9):S527–S529.

2. Mohamed MFH, Mahgoub AB, Sardar S, Elzouki AN. Acute psychosis and concurrent rhabdomyolysis unveiling diagnosis of hypothyroidism. BMJ Case Rep. 2019;12:10. doi:10.1136/bcr-2019-231579

3. Singh G, Choudhary S, Agarwal S, Yadav A. Severe hypothyroidism playing a major cause of psychiatric illness. Indian J Psychiatry. 2019;61(9):S554–S555.

4. Fernandes S, Safeekh A, Shetty S, Chandini S. Hypothyroidism presenting as hallucinosis: a clinical masquerade. Arch Med Heal Sci. 2019;7(1):90. doi:10.4103/amhs.amhs_65_19

5.Todorov L, Boudaoud AA, De Raykeer RP, et al. A case of violent suicide attempt in a context of myxedema psychosis following radioiodine treatment in a patient with graves’ disease. Case Rep Psychiatry. 2019;2019. doi:10.1155/2019/4972760.

6. Natarajan MN. Hypothyroidism presenting as psychosis - a case report n m natarajan. Univ J Med Med Specialities. 2020. Available from: http://ejournal-tnmgrmu.ac.in/index.php/medicine/article/view/11655.

7. Mavroson MM, Patel N, Akker E. Myxedema psychosis in a patient with undiagnosed Hashimoto thyroiditis. J Am Osteopath Assoc. 2017;117(1):50–54. doi:10.7556/jaoa.2017.007

8. Philip D, Bauman AJ, Comi RJ. Reversible mania: an unusual presentation of hypothyroidism. Endocr Rev. 2017;38(3).

9. Gupta A, Bastiampillai T, Disha TI, Lam DH. Rapid response to loading dose levothyroxine in myxedema psychosis. Prim Care Companion CNS Disord. 2017;19(1). doi:10.4088/PCC.16l01974

10. Rizvi A, Shaan F, Fatima N. Hashimoto’s thyroiditis presenting as acute psychosis with religious delusion: a case report. Sri Lanka J Psychiatry. 2017;8(2):29. doi:10.4038/sljpsyc.v8i2.8158

11. Fernandes VC. Severe hypothyroidism presenting with acute mania and psychosis: a case report and literature review. Bipolar Disord. 2017;3:116. doi:10.4172/2472-1077.1000116

12. Das S, Doval N, Moun V. Autoimmune thyroiditis presenting as psychosis. Shanghai Arch Psychiatry. 2017;29(3):174–176. doi:10.11919/j.issn.1002-0829.216059

13. O’Hanlon S, Kingston T. That sneaking suspicion, a case of “myxoedema madness. Ir J Med Sci. 2017;186:171–280. doi:10.1007/s11845-017-1629-5

14. Shlykov MA, Rath S, Badger A, Winder GS. “Myxoedema madness” with Capgras syndrome and catatonic features responsive to combination olanzapine and levothyroxine. BMJ Case Rep. 2016;2016:bcr2016215957. doi:10.1136/bcr-2016-215957.

15. Er C, Anil Sule A. Late onset radioiodine-induced hypothyroidism presenting with psychosis 14 years after treatment: a rare case. Oxford Med Case Rep. 2016;2016(4):68–70. doi:10.1093/omcr/omw020

16. Nazou M, Parlapani E, Nazlidou EI, Athanasis P, Bozikas VP. Psychotic episode due to Hashimoto’s thyroiditis. Psychiatrike. 2016;27(2):144–147. doi:10.22365/jpsych.2016.272.144

17. Agachanli R, Balaban OD, Sila M, Eradamlar N. Psychosis related with Hashimoto thyroiditis: a case report. Dusunen Adam. 2016;29(2):181–186. doi:10.5350/DAJPN2016290212

18. Morgado P, Mendonça-Gonçalves M. Acute mania induced by hypothyroidism in a male patient after thyroidectomy. J Neuropsychiatry Clin Neurosci. 2016;28(1):e21–e22. doi:10.1176/appi.neuropsych.15090219

19. Mehta R, Nd S, Ry M. A case report of psychosis in a patient of myxedema: myxedema madness. Available from: www.scholarena.com. Accessed December 29, 2019.

20. Larouche V, Snell L, Morris DV. Iatrogenic myxoedema madness following radioactive iodine ablation for Graves’ disease, with a concurrent diagnosis of primary hyperaldosteronism. Endocrinol Diabetes Metab Case Rep. 2015;2015. doi:10.1530/edm-15-0087.

21. Ueno S, Tsuboi S, Fujimaki M, et al. Acute psychosis as an initial manifestation of hypothyroidism: a case report. J Med Case Rep. 2015;9(1):1–4. doi:10.1186/s13256-015-0744-z

22. Hines A, Stewart JT, Catalano G. A case of capgras syndrome related to hypothyroidism. J Psychiatr Pract. 2015;21(6):445–448. doi:10.1097/PRA.0000000000000108

23. Bel Feki M, Derouiche S, Kammoun R, Mziou O, Mnif L, Melki W. Myxœdema madness: case report. Eur Psychiatry. 2015;30:1869. doi:10.1016/s0924-9338(15)31433-4

24. AmdouniI F, Abid Y, Ben Khedher M, Ghachem R. Acute psychosis in the setting of severe hypothyroidism. Eur Psychiatry. 2015;30:1270. doi:10.1016/s0924-9338(15)30994-9

25. Berkowitz MR. Resolution of hypothyroidism after correction of somatovisceral reflex dysfunction by refusion of the cervical spine. J Am Osteopath Assoc. 2015;115(1):46–49. doi:10.7556/jaoa.2015.007

26. Hynicka LM. Myxedema madness: a case for short-term antipsychotics? Ann Pharmacother. 2015;49(5):607–608. doi:10.1177/1060028015570089

27. Morosán Allo YJ, Rosmarin M, Urrutia A, et al. Myxedema madness complicating postoperative follow-up of thyroid cancer. Arch Endocrinol Metab. 2015;59(4):359–364. doi:10.1590/2359-3997000000090

28. Psychotic depression due to Hashimoto thyroiditis. Klin Psikofarmakol Bul. 2014;24:S290–S291.

29. Juneja V, Nance M. Treatment of hypothyroidism and psychosis. Aust N Z J Psychiatry. 2014;48(8):780. doi:10.1177/0004867414526285

30. Parikh N, Sharma P, Parmar C. A case report on myxedema madness: curable psychosis. Indian J Psychol Med. 2014;36(1):80–81. doi:10.4103/0253-7176.127260

31. Islam L, Selle V, Masu A, Gambini O. Latrogenic hypothyroidism leading to an acute psychotic episode. Int Clin Psychopharmacol. 2011;26:e153. doi:10.1097/01.yic.0000405898.34742.e5

32. Hypothyroidism induced psychosis: a case report. Klin Psikofarmakol Bul. 2013;23:S128–S129.

33. Lazaro PCF, Loureiro JC, Banzato CEM. Psychosis associated with methimazoleinduced hypothyroidism: a case report. J Bras Psiquiatr. 2013;62(2):171–173. doi:10.1590/S0047-20852013000200012

34. Lin CL, Yang SN, Shiah IS. Acute mania in a patient with hypothyroidism resulting from Hashimoto’s Thyroiditis. Gen Hosp Psychiatry. 2013;35(6):683.e1–683.e2. doi:10.1016/j.genhosppsych.2013.06.013

35. Dastjerdi G. Delusional type psychosis associated with hypothyroidism: a case report. Procedia - Soc Behav Sci. 2013;84:1050–1052. doi:10.1016/j.sbspro.2013.06.697

36. Hyams C, Joshi P, Foster P, Katz J. Acute psychosis caused by hypothyroidism following radioactive iodine treatment of Graves’ disease. JRSM Short Rep. 2013;4(4):1–4. doi:10.1177/2042533313476858

37. Klinik psikofarmakoloji bülteni-bulletin of clinical psychopharmacology; 2016. doi:10.1080/10177833.2013.11790875

38. Weston SN, Weston C. The mysterious case of the lost pituitary: amiodarone-induced hypothyroidism. Hosp Med. 2000;61(1):64–65. doi:10.12968/hosp.2000.61.1.1869

39. MNM Natarajan. Hypothyroidism presenting as psychosis: a case report. Indian J Psychiatry. 2013;55(S99).

40. Neal JM, Yuhico RJO. “Myxedema madness” associated with newly diagnosed hypothyroidism and obstructive sleep apnea. J Clin Sleep Med. 2012;8(6):717–718. doi:10.5664/jcsm.2274

41. Martell T, Matuszak J. Mania and psychosis in a receiving interferon. Psychiatr Ann. 2012;42(9):312–313. doi:10.3928/00485713-20120906-02

42. Leung JG. Severe hypothyroidism presenting as psychosis: a case of myxedema madness. J Pharm Pract. 2011;24(2):249. doi:10.1177/0897190011403437

43. Kumar A, Ramaraju D, Veera RL. “Seeing things with hypothyroidism”-a case report of amiodarone induced hypothyroidism presenting with hallucinations. J Am Geriatr Soc. 2011;59:S117. doi:10.1111/j.1532-5415.2011.03416.x

44. Manea M, Rusanu V, Patrichi BE, et al. P03-563 - Psychotic disorder after radioactive iodine treatment in a 42-year-old woman thyroidectomized for papillary thyroid carcinoma: case report. Eur Psychiatry. 2011;26:1733. doi:10.1016/s0924-9338(11)73437-x

45. Khemka D, Ali JA, Koch CA. Primary hypothyroidism associated with acute mania: case series and literature review. Exp Clin Endocrinol Diabetes. 2011;119(8):513–517. doi:10.1055/s-0031-1277137

46. Azzopardi L, Murfin C, Sharda A, De Silva N. Myxoedema madness. BMJ Case Rep. 2010;2010(sep16 1):bcr0320102841–bcr0320102841. doi:10.1136/bcr.03.2010.2841

47. Nielsen JM. I see dead people. Hypothyroid myopathy and hypothyroid psychosis. J Miss State Med Assoc. 2010;51(5):135–136.

48. Kandukuri RC, Khan MA, Soltys SM. Nonadherence to medication in hypothyroidism: a case report. Prim Care Companion J Clin Psychiatry. 2010;12(3). doi:10.4088/PCC.09m00863gre

49. Post-partum thyroiditis with myxedema madness. Thyroid. 2009;19:S85. doi:10.1089/thy.2009.1589

50. Sathya A, Radhika R, Mahadevan S, Sriram U. Mania as a presentation of primary hypothyroidism. Singapore Med J. 2009;50(2):e65–e67.

51. Moeller KE, Goswami R, Larsen LM. Myxedema madness rapidly reversed with levothyroxine. J Clin Psychiatry. 2009;70(11):1607–1608. doi:10.4088/JCP.08l04958yel

52. Selvaraj V, Padala PR. Thyroid myopathy with rhabdomyolysis presenting as agitation: a case report. Prim Care Companion J Clin Psychiatry. 2008;10(4):328. doi:10.4088/pcc.v10n0411a

53. Tor PC, Lee HY, Fones CSL. Late-onset mania with psychosis associated with hypothyroidism in an elderly Chinese lady. Singapore Med J. 2007;48(4):354–357.

54. Khaldi S, Dan B, Basiaux P, De Nutte N, Kornreich C. Manic episode precipitated by withdrawal of hormone replacement therapy in severe hypothyroidism. J Psychiatr Pract. 2006;12(6):409–410. doi:10.1097/00131746-200611000-00010

55. Stowell CP, Barnhill JW. Acute mania in the setting of severe hypothyroidism. Psychosomatics. 2005;46(3):259–261. doi:10.1176/appi.psy.46.3.259

56. Heinrich TW, Grahm G. Hypothyroidism presenting as psychosis. Prim Care Companion J Clin Psychiatry. 2003;05(06):260–266. doi:10.4088/pcc.v05n0603

57. Benvenga S, Lapa D, Trimarchi F. Don’t forget the thyroid in the etiology of psychoses. Am J Med. 2003;115(2):159–160. doi:10.1016/S0002-9343(03)00298-5

58. Chari S. The lesson from a yellow psychotic patient. Hosp Med. 2002;63(6):370–371. doi:10.12968/hosp.2002.63.6.2010

59. Nathan R, Rix K, Kent J. Myxoedematous madness and grievous bodily harm. J Clin Forensic Med. 1997;4(2):85–90. doi:10.1016/S1353-1131(97)90079-1

60. Westphal SA. Unusual presentations of hypothyroidism. Am J Med Sci. 1997;314(5):333–337. doi:10.1097/00000441-199711000-00011

61. Ward A, Bergmann K. Myxoedematous madness - or not?. Int J Geriatr Psychiatry. 1994;9(5):419–420.

62. Pearce MJ, Walbridge DG. Myxoedema madness: a case report. Int J Geriatr Psychiatry. 1991;6(3):189–190. doi:10.1002/gps.930060313

63. Rao AC, Bhat VK, Kini S. Myxoedema presenting with psychosis. Indian J Psychiatry. 1990;32(3):287–289.

64. Darko DF, Krull A, Dickinson M, Gillin JC, Risch SC. The diagnostic dilemma of myxedema and madness, axis I and axis II: a longitudinal case report. Int J Psychiatry Med. 1988;18(3):263–270. doi:10.2190/y6ym-9f5w-d24l-34ak

65. Davis AT. Psychotic states associated with disorders of thyroid function. Int J Psychiatry Med. 1989;19(1):47–56.

66. Santiago JM, Stoker DL, Beigel A, et al. Capgras’ syndrome in a myxedema patient. Hosp Community Psychiatry. 1987;38(2):199–201.

67. Cook DM, Boyle PJ. Rapid reversal of myxedema madness with triiodothyronine. Ann Intern Med. 1986;104(6):893–894. doi:10.7326/0003-4819-104-6-893_2

68. Shaw E, Halper J, Yi PE, Asch S. Diagnosis of “myxedema madness”. Am J Psychiatry. 1985;142(5):655. doi:10.1176/ajp.142.5.655b

69. Samuel W, Maniam T. Paranoid psychosis in myxoedema: a case report. Med J Malaysia. 1984;39(2):156–158.

70. Hall RCW, Popkin MK, Devaul R, Hall AK, Gardner ER, Beresford TP. Psychiatric manifestations of Hashimoto’s thyroiditis. Psychosomatics. 1982;23(4):337–342. doi:10.1016/S0033-3182(82)73397-3

71. Madakasira S, Hall TB. Capgras syndrome in a patient with myxedema. Am J Psychiatry. 1981;138(11):1506–1508. doi:10.1176/ajp.138.11.1506
